# Supplementary material
Source: PubMed Central journal article supplement (PMC8130179)
Supplement: NIHMS1696580-supplement-Sup__Appendix_1.pdf [file NIHMS1696580-supplement-Sup__Appendix_1.pdf]

1 SUPPLEMENTAL MATERIAL

2 METHODS:

3 Subjects

4 Subjects ages 1.1 to 19.7 years old undergoing upper endoscopy (EGD) as part of clinical care for  
5 diagnostic purposes or management of eosinophilic esophagitis (EoE) were enrolled in the study. All subjects  
6 had been on proton pump inhibitor (PPI) therapy for at least 4 weeks prior to endoscopy, had no history of  
7 antibiotic or systemic steroid use, and did not carry a diagnosis of any other gastrointestinal (GI) tract  
8 inflammatory disease. Informed consent, and when appropriate, assent was obtained from all subjects.

9 Because we began this study prior to the AGREE (A Working Group on PPI-REE) guidelines [1], EoE  
10 diagnosis was based on 2011 clinical guidelines of esophageal symptoms and  $\geq 15$  eosinophils per high power  
11 field (eos/hpf) after a PPI trial [2]. Subjects not meeting EoE criteria and those without any histological  
12 esophageal inflammation in the proximal GI tract after PPI therapy were considered non-EoE controls. The active  
13 EoE group was further stratified as active steroid-naïve ( $\geq 15$  eos/hpf after PPI trial and/or dietary intervention;  
14 no topical swallowed steroid (TSS)) or steroid-non-responder ( $\geq 15$  eos/hpf; currently on TSS). The inactive EoE  
15 group was divided into inactive steroid-naïve ( $< 15$  eos/hpf after dietary intervention) and steroid-responder ( $< 15$   
16 eos/hpf currently on TSS) (Figure 1). A subgroup of 9 subjects who responded to TSS were studied longitudinally  
17 (Figure 2). Patients with endoscopic signs of esophageal candidiasis whose samples resulted in positive *Candida*  
18 cultures were excluded.

19 Esophageal biopsies were collected during endoscopy using sterile forceps, placed in dry ice and then  
20 stored at -80 degrees Celsius until processing, as previously described [3].

21 Sample processing and library preparation

22 DNA was extracted from esophageal biopsies using the MoBio PowerSoil® DNA Isolation Kit (Catalog #  
23 12888-50). To profile bacterial communities, the V1-V2 variable regions of the bacterial 16S rRNA gene were  
24 amplified using barcoded primer sequences 27F (AGAGTTTGATCCTGGCTCAG) and 338R  
25 (TGCTGCCTCCCGTAGGAGT), as described previously. Purified PCR products were pooled in equal amounts  
26 and sequenced on the Illumina MiSeq, yielding 250bp paired-end sequence reads. Four negative control  
27 samples were included along with the experimental samples, as well as four synthetic positive control samples  
28 [4].

29 To profile fungal communities, the Internal Transcribed Spacer (ITS) region was amplified from the  
30 extracted DNA using barcoded primer sequences ITS1F (CTTGGTCATTTAGAGGAAGTAA) [5] and ITS2  
31 (GCTGCGTTCTTCATCGATGC) [6]. Purified PCR products were quantified by the PicoGreen dsDNA  
32 quantitation assay (ThermoFisher, Waltham, MA USA). Paired-end sequencing was carried out on the Illumina  
33 MiSeq as for the 16S rRNA gene products. As a positive control, two samples from *Cryptococcus diffluens*  
34 culture stocks were included. A set of four negative control samples was also included on the ITS sequencing  
35 run, to enable identification and removal of contaminant sequences [7].

### 36 Bioinformatics analysis

37 Read pairs from 16S rRNA marker gene sequencing were processed using QIIME version 1.9 [8]. Reads  
38 were joined to form a complete amplicon sequence for the V1-V2 region, with a minimum overlap of 35 base  
39 pairs and a maximum overlap difference of 15%. Sequences were filtered to remove low quality reads, with a  
40 minimum quality threshold of Q20. Operational Taxonomic Units (OTUs) were generated at 97% sequence  
41 similarity using UCLUST v. 1.2.22 [9]. Taxonomic assignments were generated with the default method in QIIME,  
42 using the Greengenes reference database v. 13\_8 [10]. The counts of OTUs that were assigned to the same  
43 taxon at the genus level or the most specific level when they could not be identified at a genus level were summed  
44 to obtain taxon level abundances. These counts were divided by the total number of assignments in a sample to  
45 calculate taxon level relative abundance. These were then used for differential abundance analysis. A  
46 phylogenetic tree was inferred from the OTU data using FastTree2 [11]. Similarity between samples was  
47 assessed by weighted and unweighted UniFrac distance [12, 13].

48 Data from fungal ITS amplicon sequencing were also analyzed using QIIME. Due to the variable length of the  
49 ITS region, only the forward reads were used. Sequence reads were quality filtered as above. To improve  
50 taxonomic resolution for fungal sequences, OTUs were generated at 100% similarity using UCLUST. The  
51 representative sequences of the OTUs were aligned to the NCBI nucleotide database using BLAST, and the  
52 consensus taxonomic assignments were generated using the BROCC software [14]. OTUs appearing in  
53 *Cryptococcus diffluens* positive control samples were removed from the analysis. OTUs classified in the  
54 *Chordata* phylum were also removed from the analysis to eliminate contamination from non-fungal sources. The  
55 remaining abundances were normalized using PicoGreen DNA quantification data as described previously [7].

To account for total fungal abundance and potential admixture of environmental sources, we multiplied the fungal OTU relative abundances by the post-PCR PicoGreen concentration for each sample, to obtain a PicoGreen-corrected OTU abundance [7].

### Statistical analysis

Data files from QIIME were analyzed in the R environment. Unweighted and weighted UniFrac distances between samples were visualized using Principal Coordinate Analysis (PCoA), and differences between groups were assessed with the PERMANOVA test [15]. For taxa present in more than 80% of the samples, relative abundance was analyzed using generalized linear models. Fisher's exact test was used to assess if taxa were differentially present or absent between groups. Where multiple taxa were tested in the same analysis, the p-values were corrected for false discovery rate using the method of Benjamini and Hochberg [16].

In the longitudinal sub-study, we evaluated the microbial community shift across timepoints by using PERMANOVA on UniFrac distances. We calculated the p values by permuting the time points only within each subject. To identify the bacteria that changed across time points, we used generalized linear mixed effects models and added a random intercept term for each subject.

### REFERENCES

1. Dellon, E.S., et al., Updated International Consensus Diagnostic Criteria for Eosinophilic Esophagitis: Proceedings of the AGREE Conference. *Gastroenterology*, 2018. **155**(4): p. 1022-1033 e10.
2. Liacouras, C.A., et al., Eosinophilic esophagitis: updated consensus recommendations for children and adults. *J Allergy Clin Immunol*, 2011. **128**(1): p. 3-20 e6; quiz 21-2.
3. Benitez, A.J., et al., Inflammation-associated microbiota in pediatric eosinophilic esophagitis. *Microbiome*, 2015. **3**: p. 23.
4. Kim, D., et al., Optimizing methods and dodging pitfalls in microbiome research. *Microbiome*, 2017. **5**(1): p. 52.
5. Gardes, M. and T.D. Bruns, ITS primers with enhanced specificity for basidiomycetes--application to the identification of mycorrhizae and rusts. *Mol Ecol*, 1993. **2**(2): p. 113-8.
6. White, T.J., T. Bruns, S. Lee & J. Taylor, Amplification and direct sequencing of fungal ribosomal RNA genes for phylogenetics, in *PCR Protocols: A Guide to Methods and Applications*, N. Innis, D. Gelfand, J. Sninsky & T. White, Eds., Editor. 1990, Academic Press. p. 315-322.
7. Bittinger, K., et al., Improved characterization of medically relevant fungi in the human respiratory tract using next-generation sequencing. *Genome Biol*, 2014. **15**(10): p. 487.
8. Caporaso, J.G., et al., QIIME allows analysis of high-throughput community sequencing data. *Nat Methods*, 2010. **7**(5): p. 335-6.
9. Edgar, R.C., Search and clustering orders of magnitude faster than BLAST. *Bioinformatics*, 2010. **26**(19): p. 2460-1.
10. McDonald, D., et al., An improved Greengenes taxonomy with explicit ranks for ecological and evolutionary analyses of bacteria and archaea. *ISME J*, 2012. **6**(3): p. 610-8.
11. Price, M.N., P.S. Dehal, and A.P. Arkin, FastTree 2--approximately maximum-likelihood trees for large alignments. *PLoS One*, 2010. **5**(3): p. e9490.
12. Lozupone, C. and R. Knight, UniFrac: a new phylogenetic method for comparing microbial communities. *Appl Environ Microbiol*, 2005. **71**(12): p. 8228-35.

- 96 13. Lozupone, C.A., et al., Quantitative and qualitative beta diversity measures lead to different insights into  
97 factors that structure microbial communities. *Appl Environ Microbiol*, 2007. **73**(5): p. 1576-85.  
98 14. Dollive, S., et al., A tool kit for quantifying eukaryotic rRNA gene sequences from human microbiome  
99 samples. *Genome Biol*, 2012. **13**(7): p. R60.  
100 15. Anderson, M.J., A new method for non-parametric multivariate analysis of variance. *Austral Ecology*,  
101 2008.  
102 16. Benjamini, Y.H., Yosef, Controlling the false discovery rate: a practical and powerful approach to multiple  
103 testing. *Journal of the Royal Statistical Society, Series B*, 1995. **57**(1): p. 289-300.  
104

105 SUPPLEMENTAL TABLE AND FIGURES  
106

| Supplemental Table 1. Patients' characteristics |                 |                  |                 |
|-------------------------------------------------|-----------------|------------------|-----------------|
|                                                 | Controls (n=10) | EoE (n=69)       |                 |
|                                                 |                 | Active (n=33)    | Inactive (n=36) |
| <b>Demographics</b>                             |                 |                  |                 |
| Age in years – median (IQR)                     | 8.05 (1.6-13.3) | 12.10 (6.9-15.8) | 9.5 (7.0-13.0)  |
| Gender-n (%)                                    |                 |                  |                 |
| Male                                            | 6 (60%)         | 25 (76%)         | 33 (92%)        |
| Female                                          | 4, (40%)        | 8 (23%)          | 3 (8%)          |
| Ethnicity - n (%)                               |                 |                  |                 |
| Caucasian                                       | 7 (70% )        | 19 (58%)         | 31 (86%)        |
| African American                                | 2 (20%)         | 8 (24%)          | 3 (8%)          |
| Hispanic                                        | 1 (10%)         | 2 (6%)           | 1 (3%)          |
| Other                                           | 1 (13%)         | 4 (12%)          | 1 (3%)          |
| <b>Indication - n (%)</b>                       |                 |                  |                 |
| Abdominal pain                                  | 5 (50%)         | 1 (3%)           | 2 (6%)          |
| Failure to thrive                               | 2 (20%)         | 1 (3%)           | 0 (0%)          |
| Dysphagia                                       | 0 (0%)          | 9 (27%)          | 1 (3%)          |
| EoE surveillance                                | 0 (0%)          | 16 (48%)         | 35 (97%)        |
| <b>Symptomatology - n (%)</b>                   |                 |                  |                 |
| Heartburn                                       | 0 (0%)          | 1 (3%)           | 1 (3%)          |
| Dysphagia                                       | 0 (0%)          | 12 (36%)         | 5 (14%)         |
| Regurgitation                                   | 0 (0%)          | 4 (12%)          | 4 (11%)         |
| Abdominal pain                                  | 4 (40%)         | 3 (9%)           | 6 (17%)         |
| Food impaction                                  | 0 (0%)          | 9 (27%)          | 6 (17%)         |
| <b>Allergy history - n (%)</b>                  |                 |                  |                 |
| Asthma                                          | 2 (20%)         | 19 (58%)         | 25 (69%)        |
| Eczema                                          | 0 (0%)          | 17 (52%)         | 15 (42%)        |
| Allergic Rhinitis                               | 2 (20%)         | 11 (33%)         | 21 (58%)        |
| <b>Medications - n (%)</b>                      |                 |                  |                 |
| PPI                                             | 10 (100%)       | 33 (100%)        | 36 (100%)       |
| Topical swallowed steroids                      | 0 (0%)          | 16 (48%)         | 18 (50%)        |
| Inhaled steroids                                | 0 (0%)          | 7 (21%)          | 17 (47%)        |
| Nasal steroids                                  | 2 (20%)         | 9 (27%)          | 19 (53%)        |
| <b>EGD Findings - n (%)</b>                     |                 |                  |                 |
| Furrows                                         | 0 (0%)          | 19 (58%)         | 8 (22%)         |
| Exudates                                        | 0 (0%)          | 6 (18%)          | 2 (6%)          |
| Rings                                           | 0 (0%)          | 3 (9%)           | 0 (0%)          |

| <b>Histologic Findings</b>                                                                                                                                           |   |            |         |
|----------------------------------------------------------------------------------------------------------------------------------------------------------------------|---|------------|---------|
| Eos/hpf - median (IQR)                                                                                                                                               | 0 | 40 (30-50) | 0 (0-1) |
| EoE - eosinophilic esophagitis, IQR - Interquartile Range, Eos/hpf - eosinophils per high power field, PPI - proton pump inhibitor, EGD – esophagogastroduodenoscopy |   |            |         |

107  
108  
109  
110  
111  
112  
113  
114  
115  
116  
117  
118

SUPPLEMENTAL FIGURE LEGENDS

Supplemental Figure 1: Schematic of study design. Proton pump inhibitors (PPI). Eosinophils per high power field (eos/hpf). Topical swallowed steroids (TSS).

Supplemental Figure 2: Total PicoGreen-corrected fungal abundance for subjects not on topical swallowed steroid (TSS) therapy (noTSS) and subjects on topical swallowed steroid (TSS) therapy and its association with the number of eosinophils. Figure includes both subjects with active and inactive eosinophilic esophagitis (EoE).
