# Supplementary material
Source: PubMed Central journal article supplement (PMC8130179)

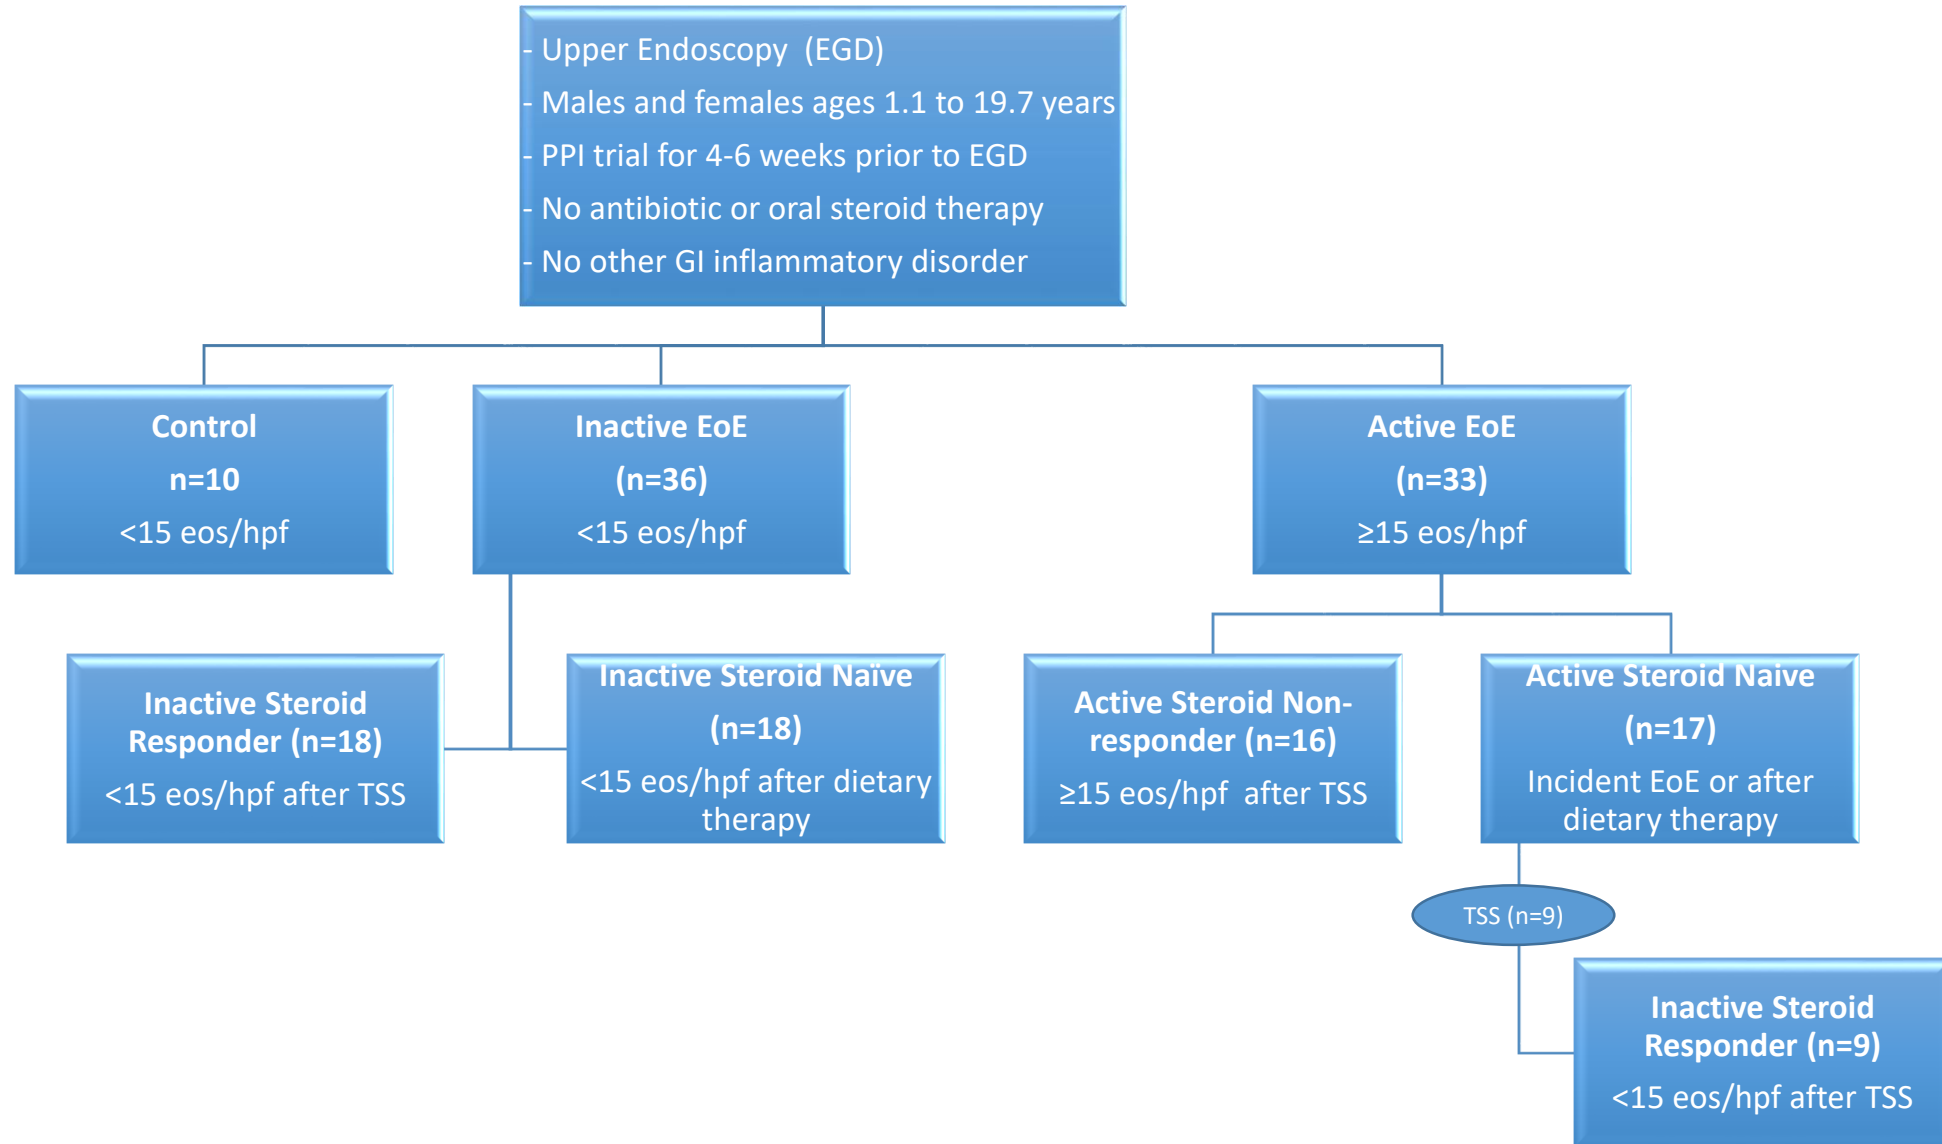

Supplement: NIHMS1696580-supplement-Sup_Fig__1.pdf [file NIHMS1696580-supplement-Sup_Fig__1.pdf]

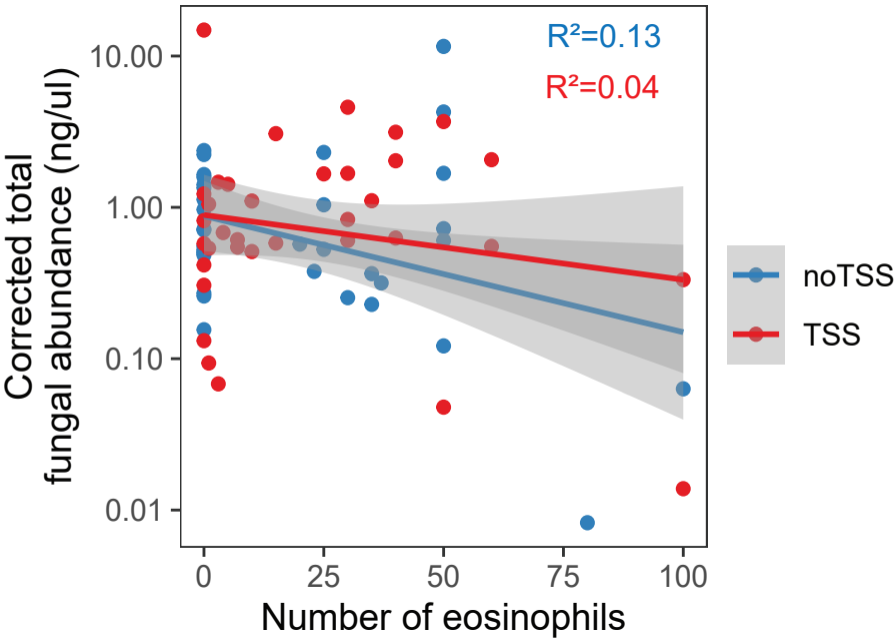

Supplement: NIHMS1696580-supplement-Sup_Fig__2.pdf [file NIHMS1696580-supplement-Sup_Fig__2.pdf]
